# Supplementary material for: In-Situ Thermoresponsive Hydrogel Containing Resveratrol-Loaded Nanoparticles as a Localized Drug Delivery Platform for Dry Eye Disease
Source: MDPI journal article supplement (doi:10.3390/antiox12050993), 2023-04-25
Supplement: s1 [file s1]

Figure S1

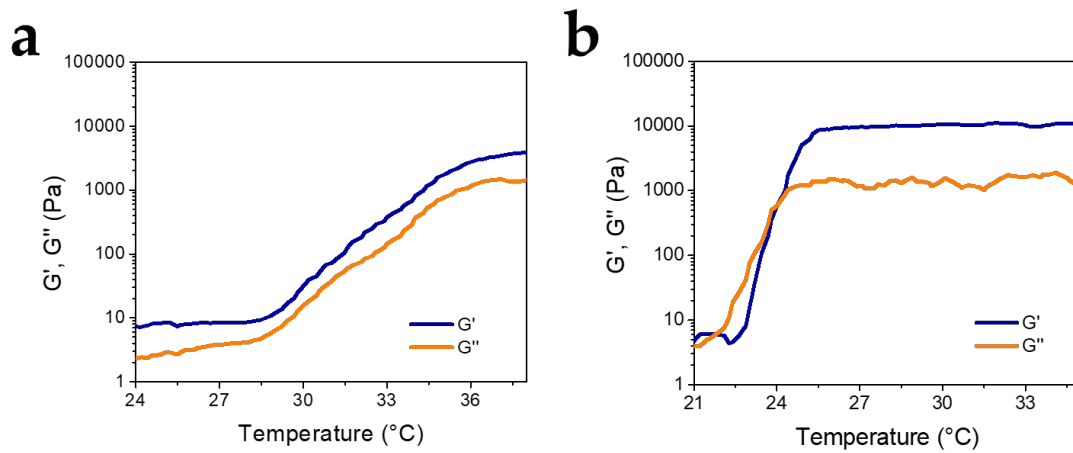

**Figure S1.** Evolution of the dynamic storage and dissipative moduli ( $G'$  and  $G''$ ) in non-isothermal oscillatory shear experiments of RSV@Tgel formulations containing (a) 22%, and (b) 17% w/v poloxamer 407.

Figure S2

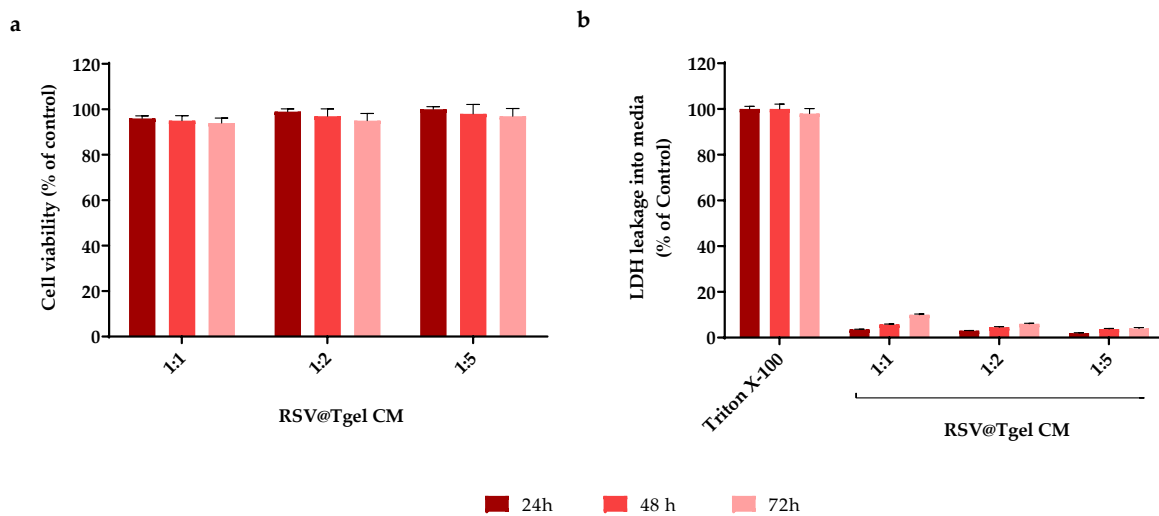

**Figure S2.** In vitro biocompatibility of RSV@Tgel after 24, 48, and 72 h. Cell viability (A) and Lactate Dehydrogenase (LDH) release (B) were assessed in HCECs incubated with different concentrations of RSV@Tgel conditioned medium (CM; 1:1, 1:2, and 1:5 v/v). Untreated cells and Triton X-100 treated cells were considered as negative and positive control, respectively. Results are expressed as the mean of three independent experiments  $\pm$  S.D ( $n = 3$ )
